# Supplementary material for: Improvement effect of a next-generation probiotic L. plantarum-pMG36e-GLP-1 on type 2 diabetes mellitus via the gut–pancreas–liver axis
Source: Royal Society of Chemistry journal article supplement (doi:10.1039/d3fo00044c), 2023-01-01
Supplement: d3fo00044c1.pdf [file d3fo00044c1.pdf]

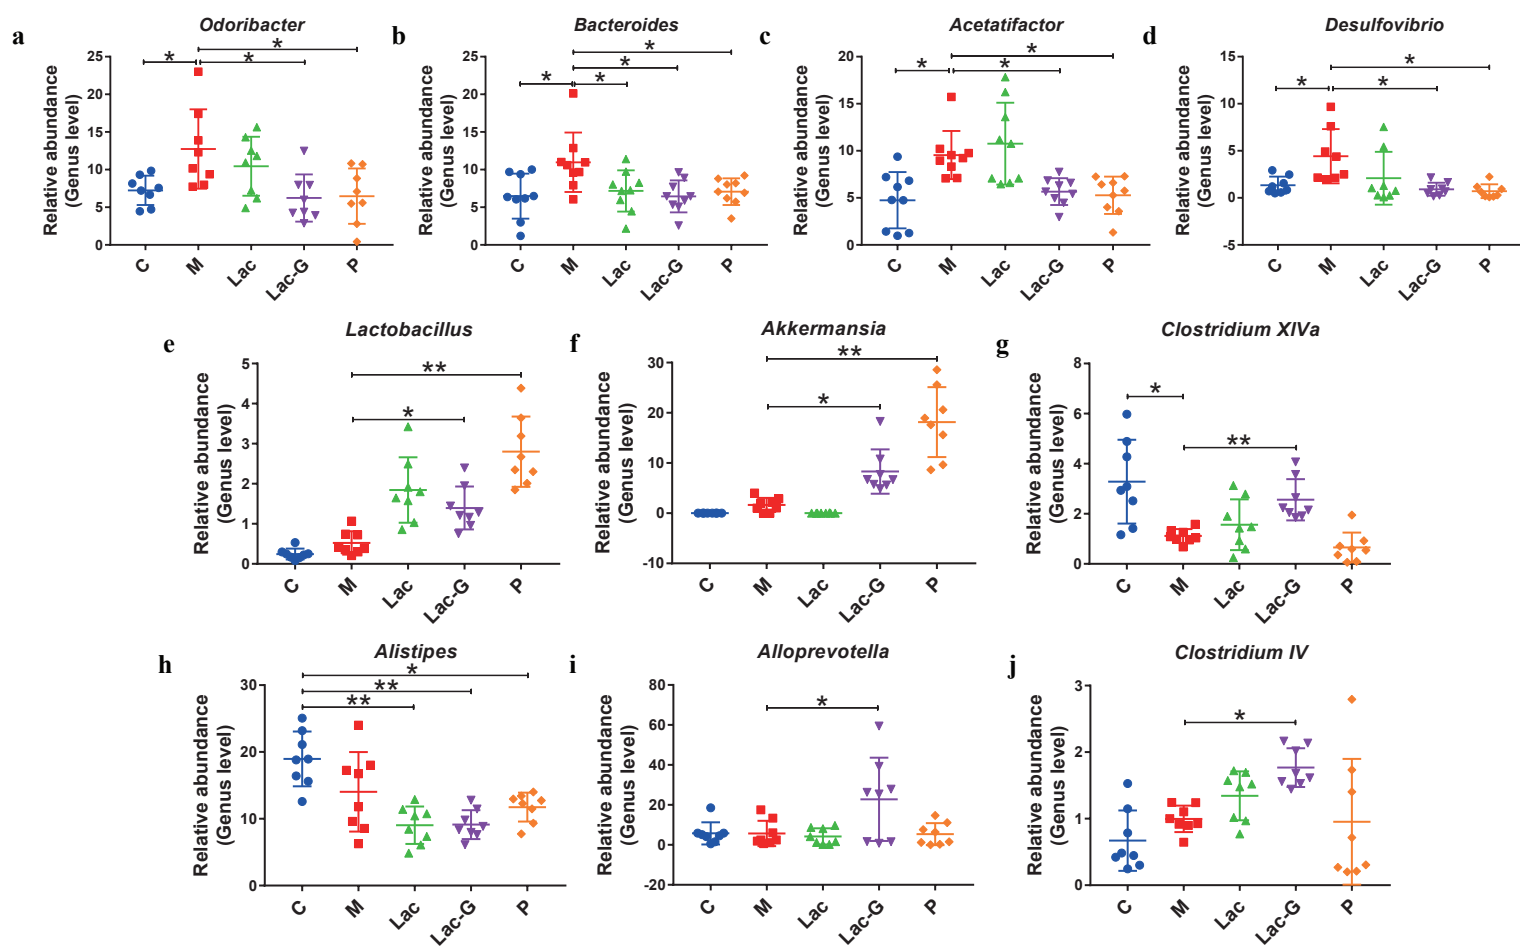

**Figure S1 The regulation of *L. plantarum*-pMG36e-GLP-1 on the abundance of intestinal beneficial bacteria.** The relative abundance of *Odoribacter* (a), *Bacteroides* (b), *Acetatifactor* (c), *Desulfovibrio* (d), *Lactobacillus* (e), *Akkermansia* (f), *Clostridium XIVa* (g), *Alistipes* (h), *Alloprevotella* (i) and *Clostridium IV* (j) were analyzed. Data are presented as means  $\pm$  SD. One way repeated-measures ANOVA with Tukey's test for multiple comparisons (a-j, respectively); \* $p < 0.05$ , \*\* $p < 0.01$ .
